# Supplementary material
Source: PubMed Central journal article supplement (PMC4005896)
Supplement: NIHMS570638-supplement-Sup_Data.pdf [file NIHMS570638-supplement-Sup_Data.pdf]

a young mice

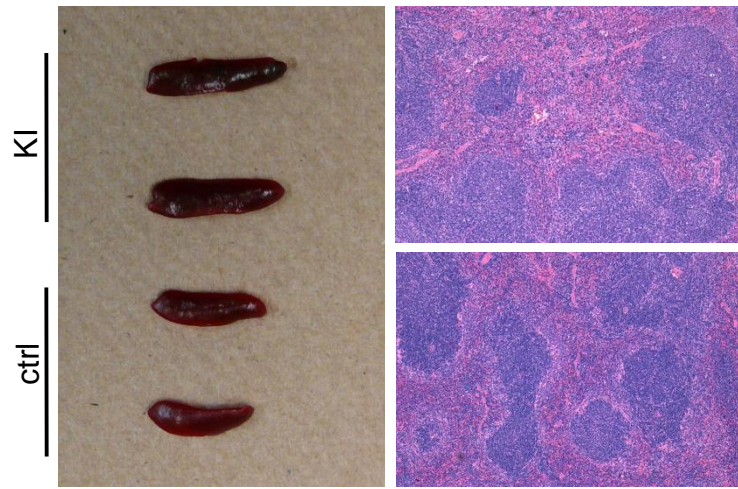

50x

b older mice

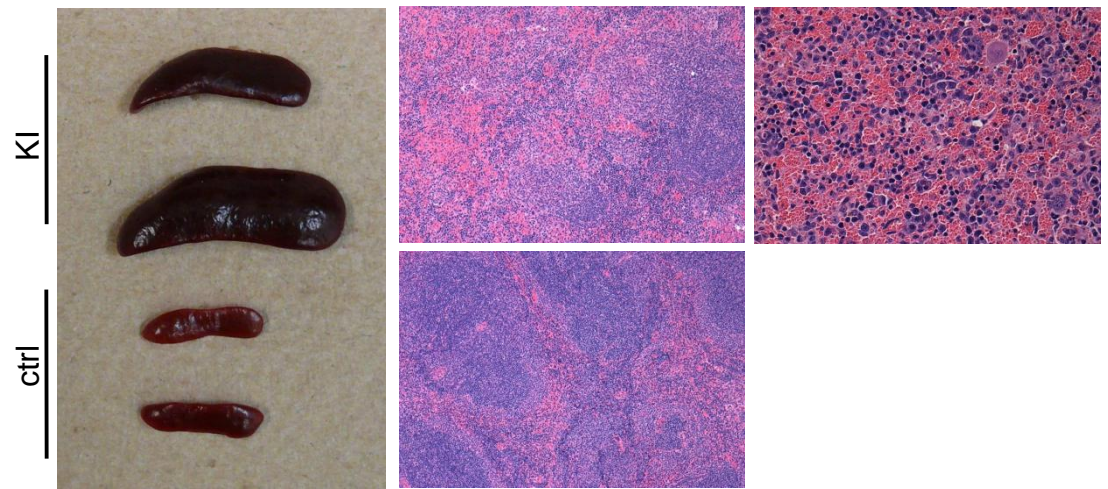

50x

200x

c bone marrow

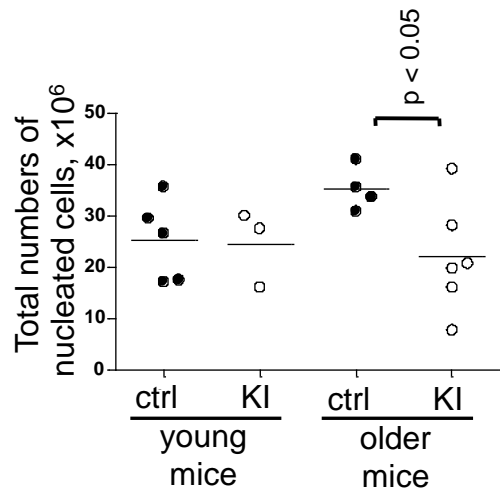

d bone marrow

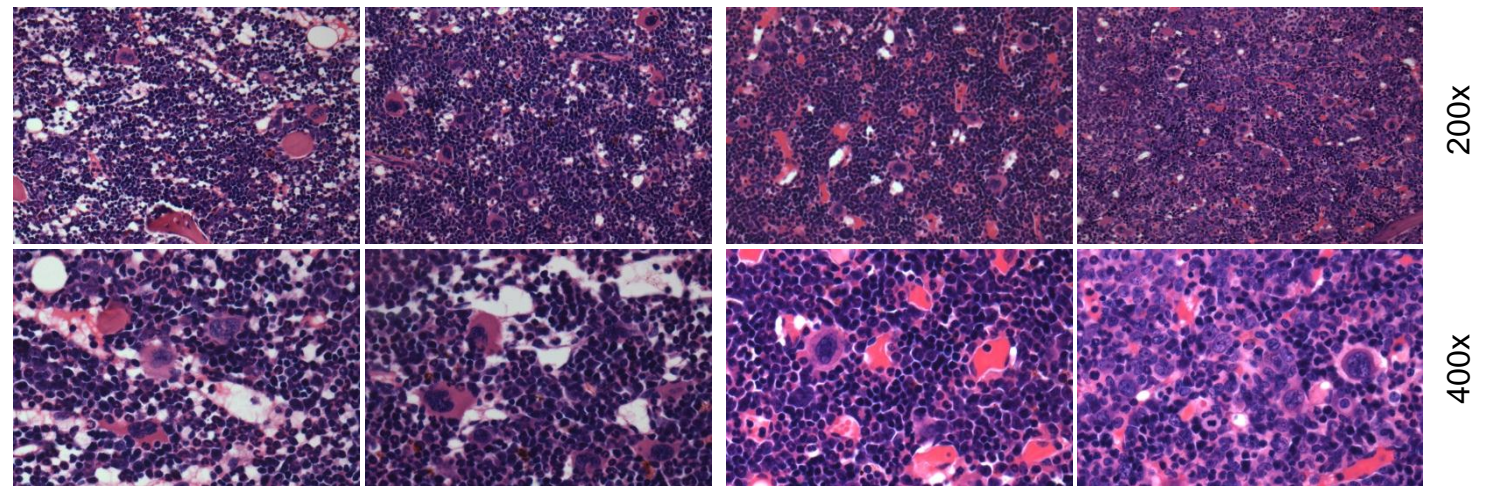

ctrl - 16 weeks

KI - 16 weeks

ctrl - 46 weeks

KI - 46 weeks

Figure 1 |

**a** Gated on live lineage-negative cells

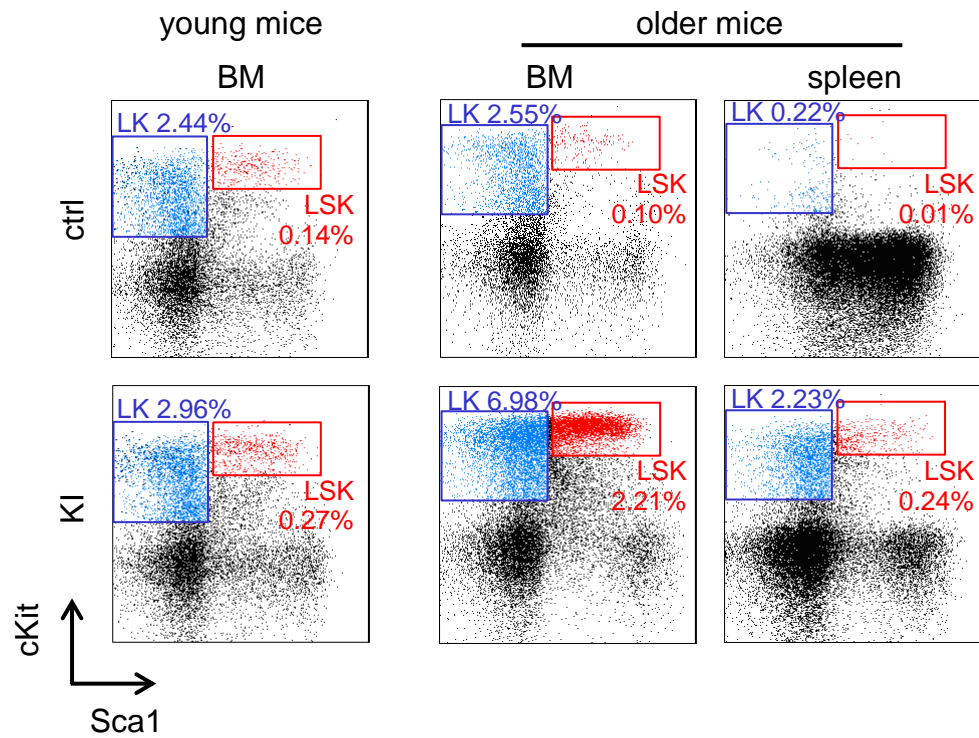

**b** young mice

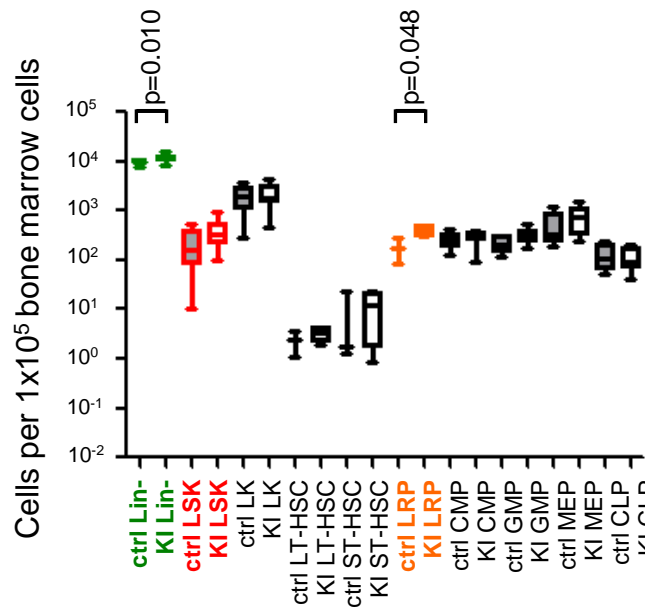

**c** older mice

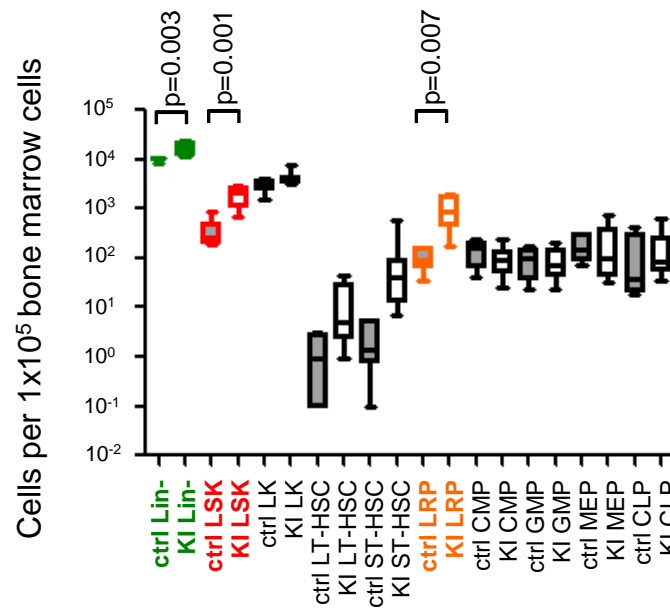

**d**

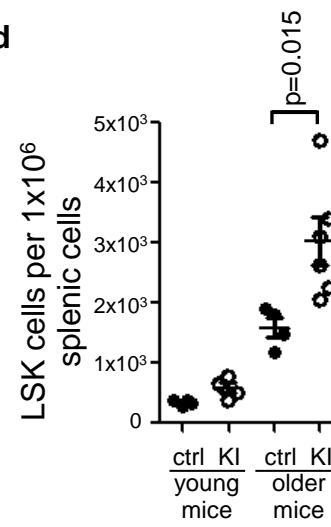

**e**

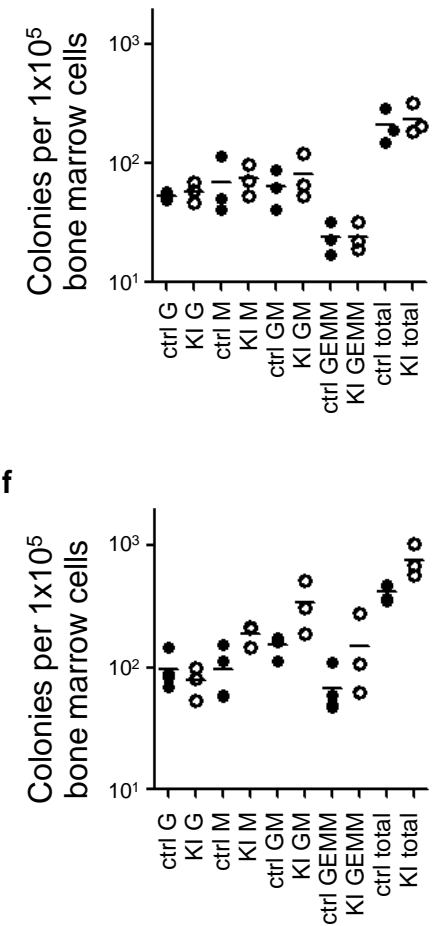

**f**

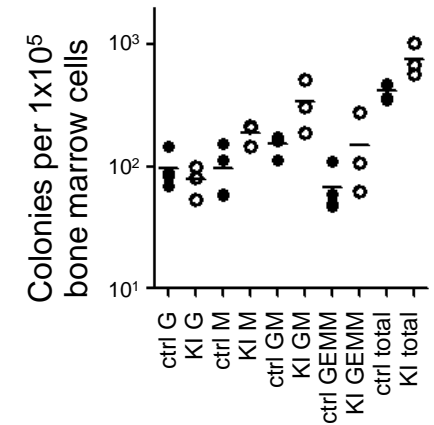

**g**

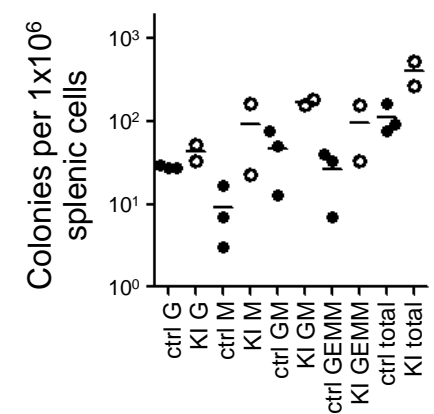

**Figure 2**

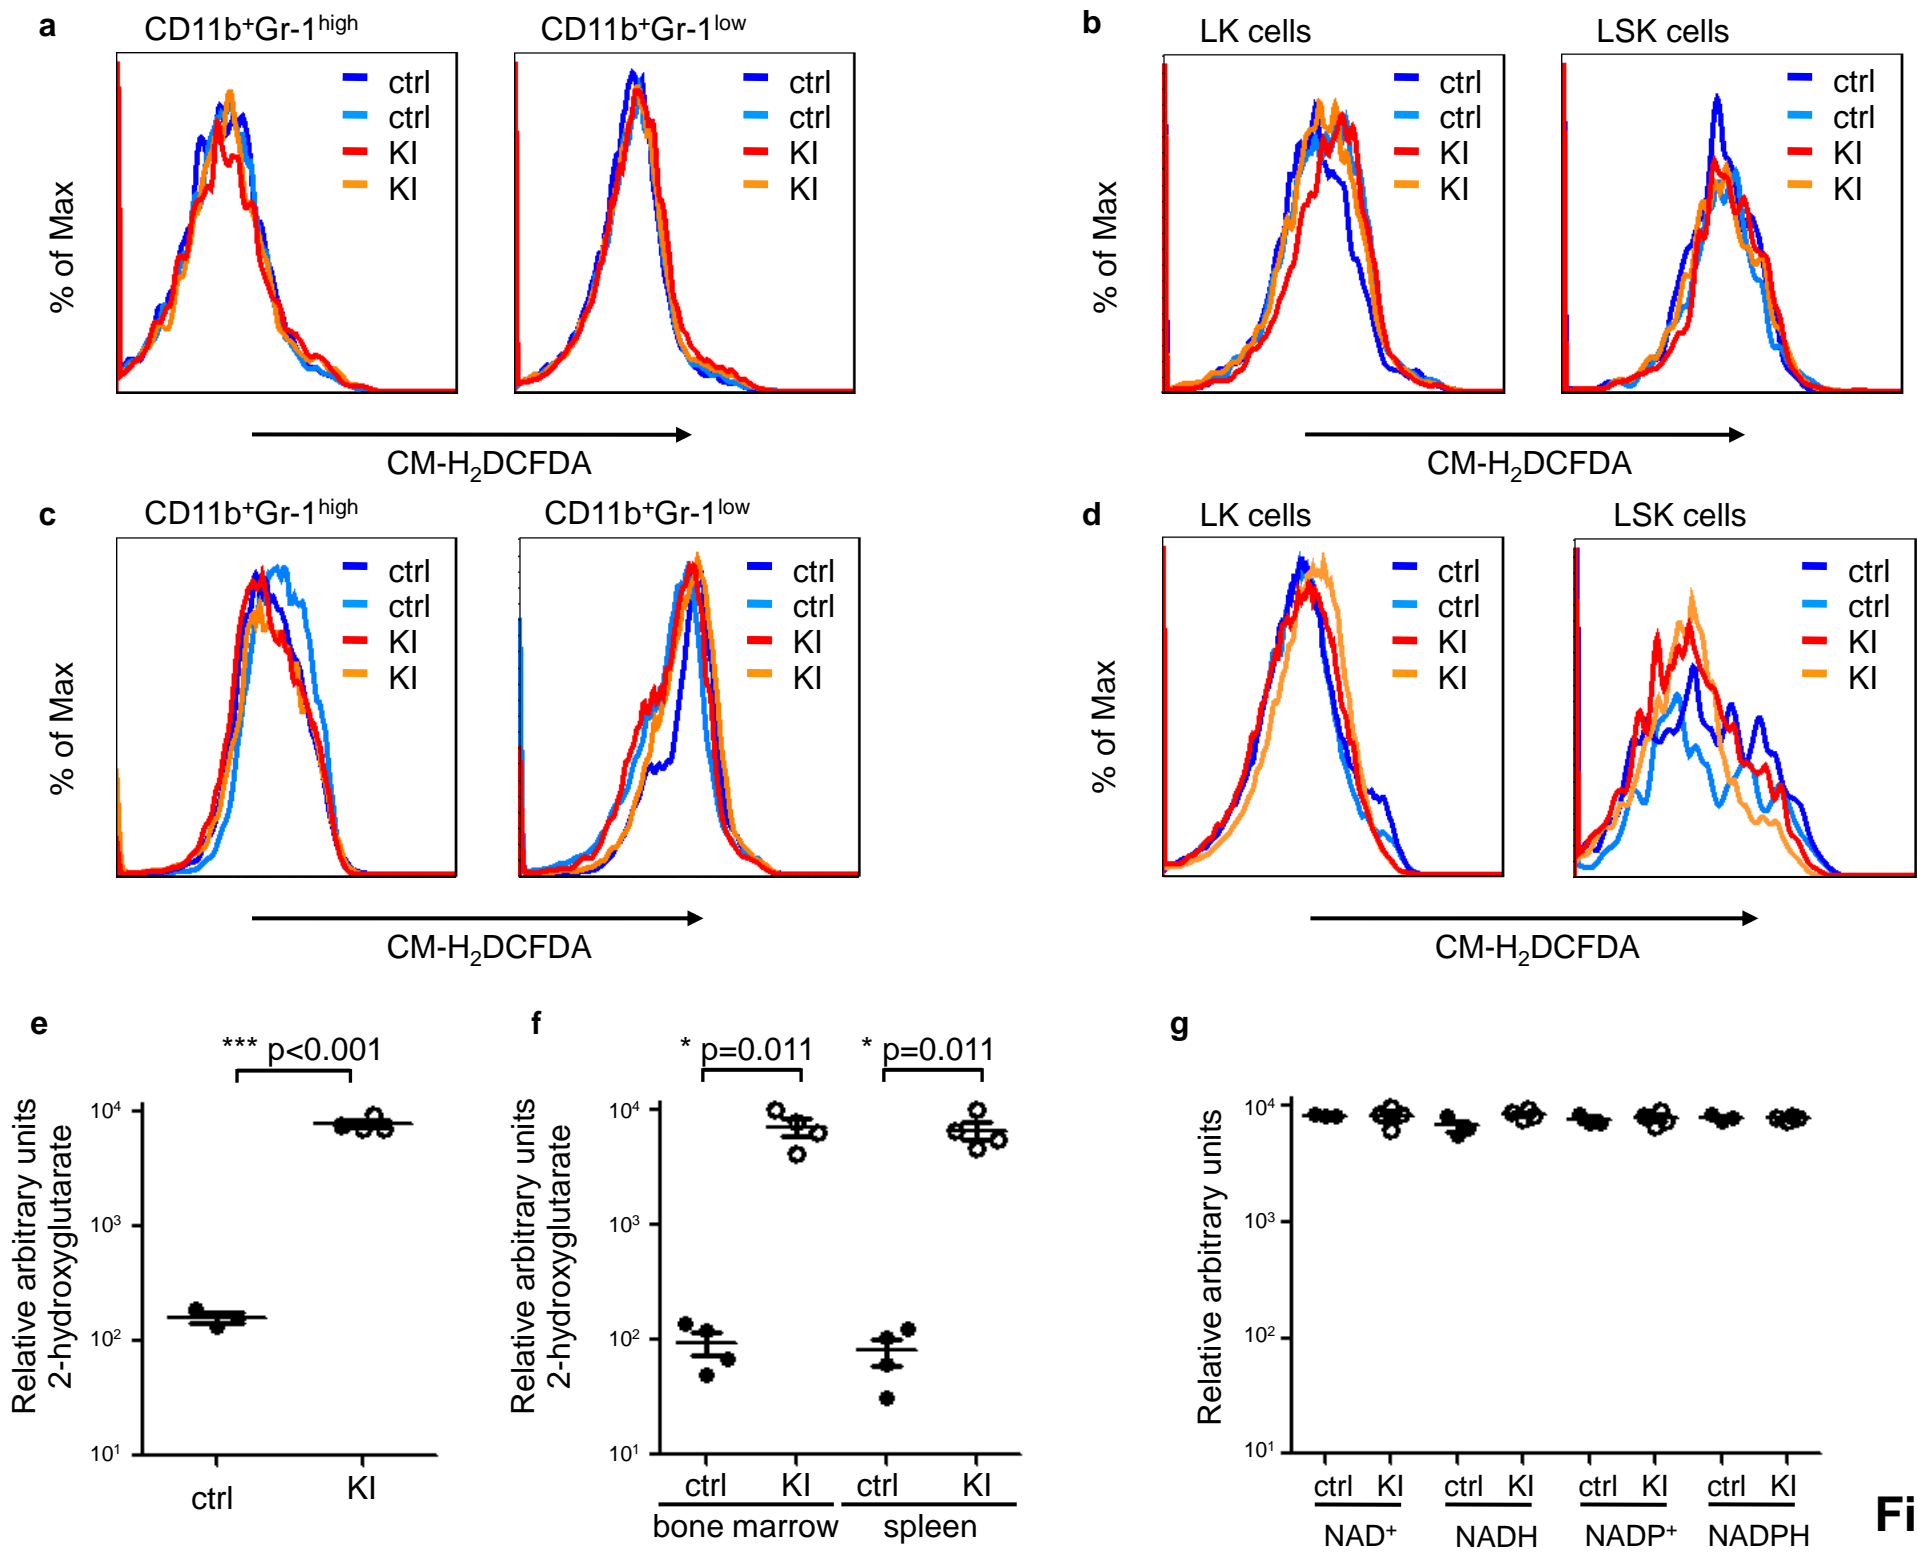

**Figure 3**

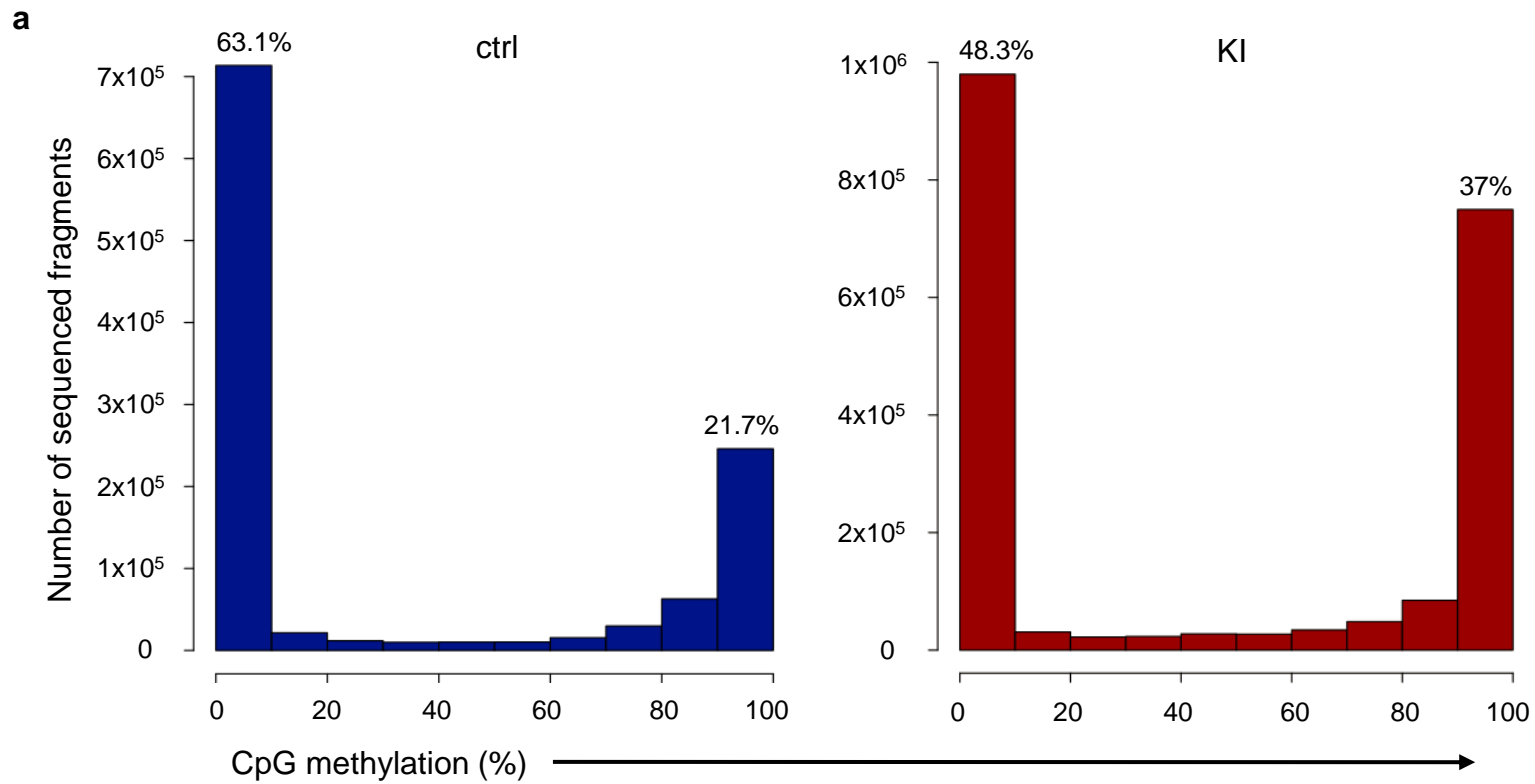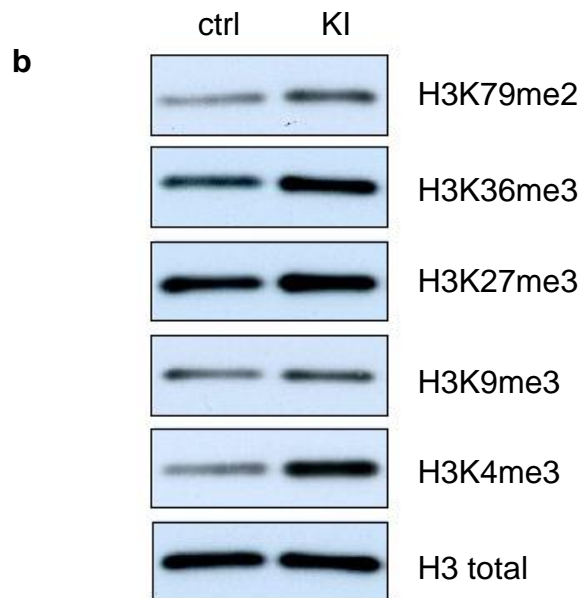

**Figure 4**

**a** **WBC**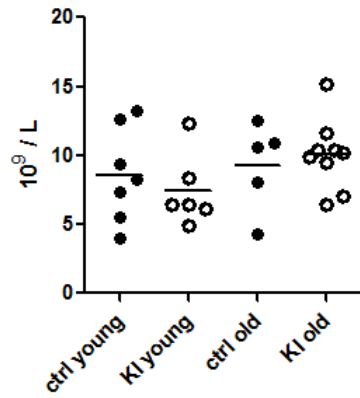**b** **RBC**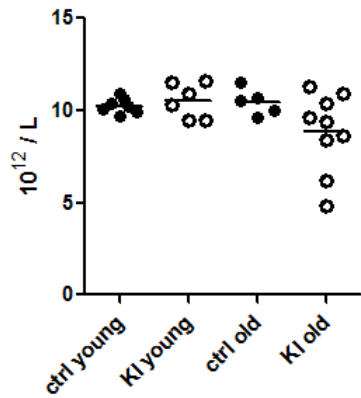**c** **Hct**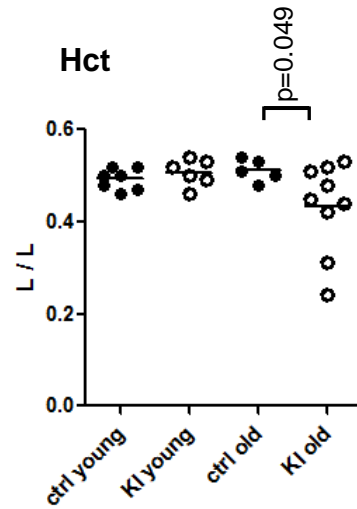**d** **Hb**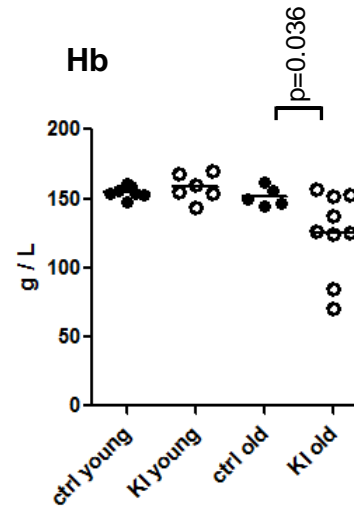**e** **MCHC**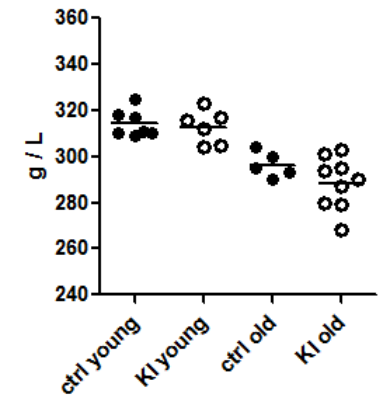**f**

|      | Young mice (7-16 weeks) |        |                      |        |         | Older mice (42-46 weeks) |        |                      |        |         |
|------|-------------------------|--------|----------------------|--------|---------|--------------------------|--------|----------------------|--------|---------|
|      | WT<br>Mean $\pm$ SEM    | N<br>= | KI<br>Mean $\pm$ SEM | N<br>= | p-value | WT<br>Mean $\pm$ SEM     | N<br>= | KI<br>Mean $\pm$ SEM | N<br>= | p-value |
| WBC  | 8.600 $\pm$ 1.295       | 7      | 7.400 $\pm$ 1.076    | 6      | 0.4924  | 9.260 $\pm$ 1.435        | 5      | 10.07 $\pm$ 0.851    | 9      | 0.6458  |
| RBC  | 10.26 $\pm$ 0.156       | 7      | 10.55 $\pm$ 0.383    | 6      | 0.5050  | 10.46 $\pm$ 0.323        | 5      | 8.844 $\pm$ 0.718    | 9      | 0.0674  |
| Hct  | 0.493 $\pm$ 0.009       | 7      | 0.507 $\pm$ 0.012    | 6      | 0.3803  | 0.512 $\pm$ 0.011        | 5      | 0.433 $\pm$ 0.033    | 9      | 0.0491* |
| Hb   | 154.9 $\pm$ 1.710       | 7      | 158.3 $\pm$ 4.072    | 6      | 0.4612  | 151.6 $\pm$ 3.311        | 5      | 125.3 $\pm$ 10.13    | 9      | 0.0359* |
| MCHC | 314.3 $\pm$ 2.244       | 7      | 312.8 $\pm$ 3.005    | 6      | 0.7075  | 296.4 $\pm$ 2.502        | 5      | 286.3 $\pm$ 4.308    | 9      | 0.1112  |

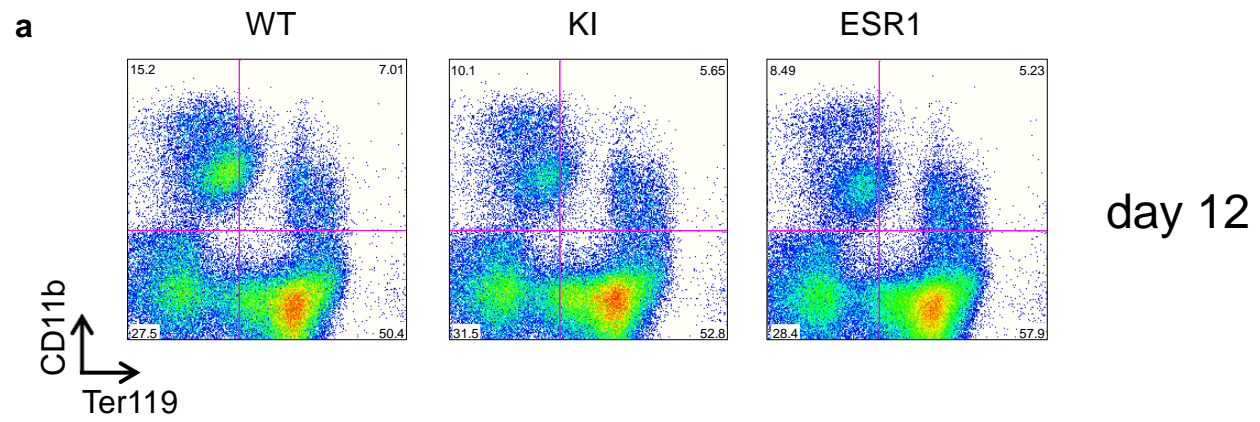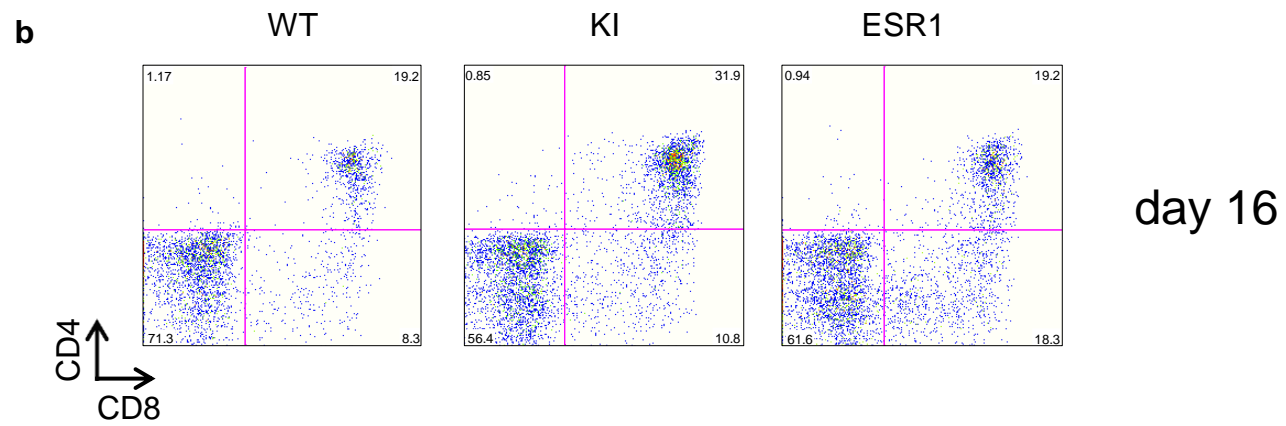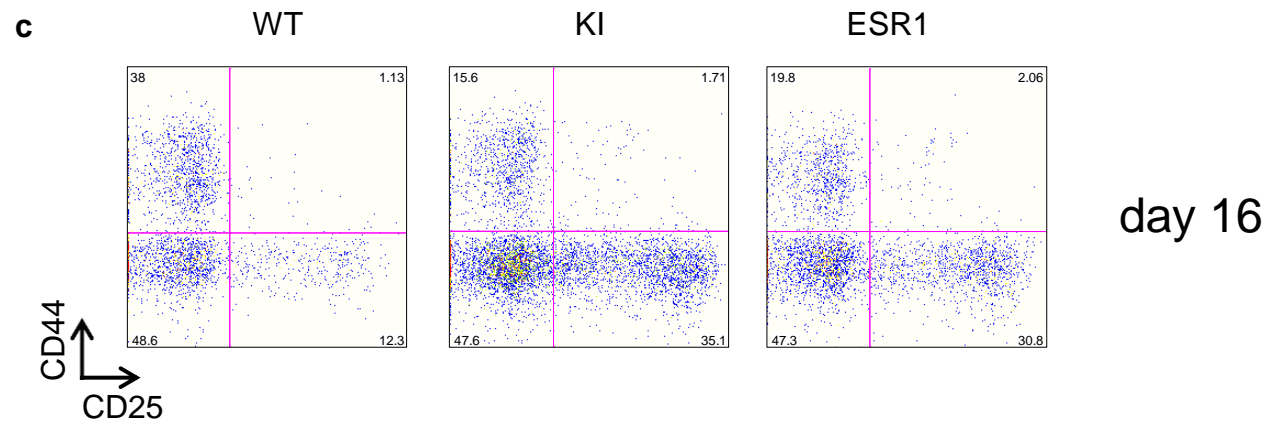

**a**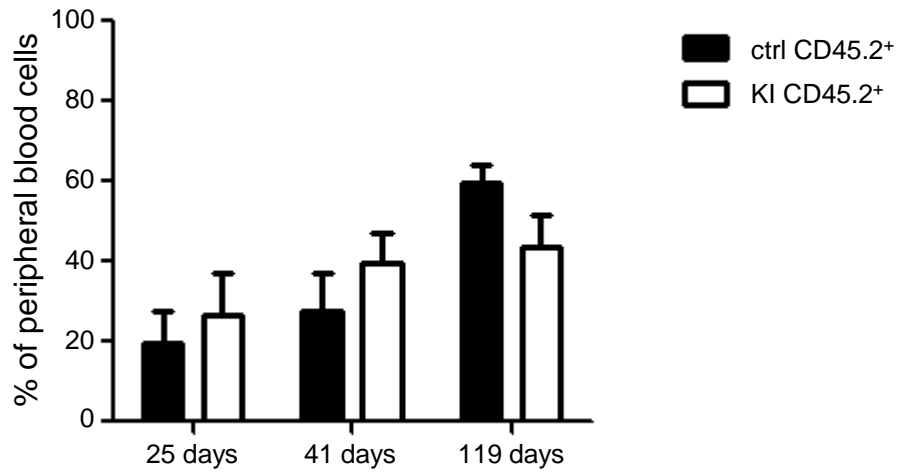**b**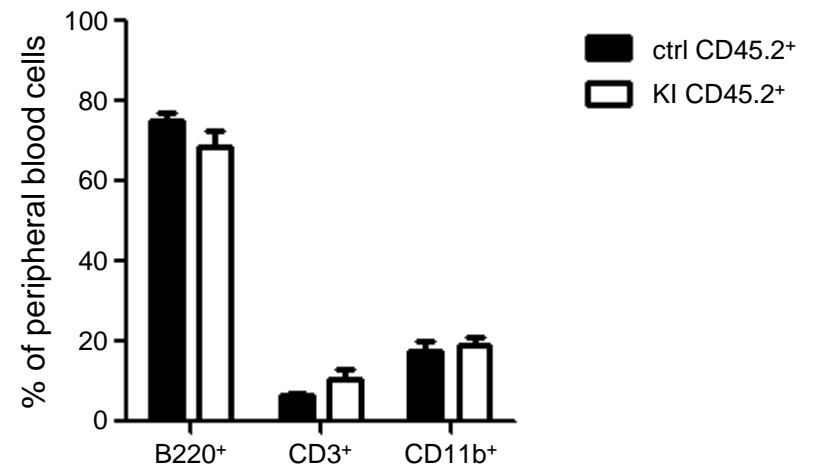

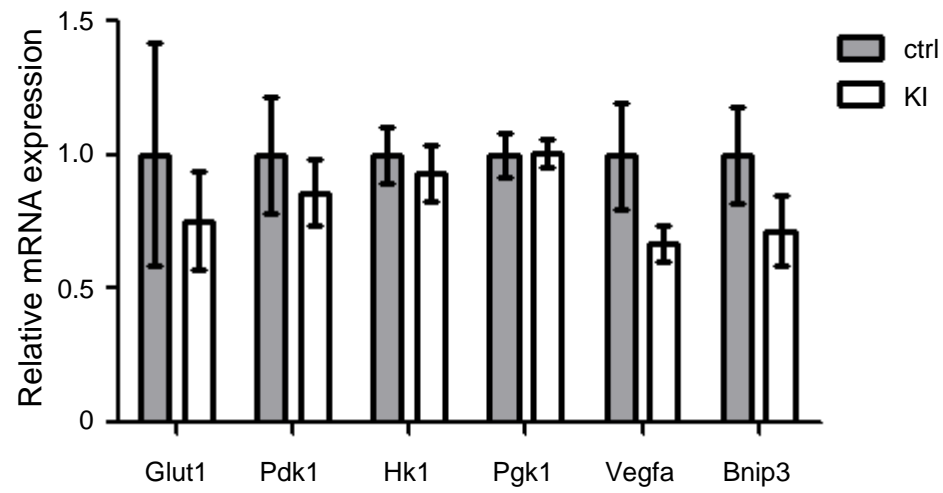



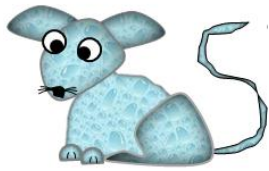

LysMCre-  
R132H-IDH1-KI

- Elevated 2HG levels
- ↳ Changes in histone methylation
- ↳ Changes in DNA methylation

symmetric  
cell division

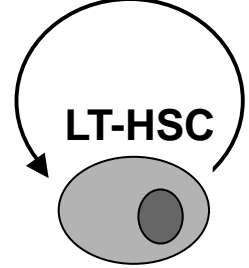

CD150<sup>+</sup>  
CD48<sup>-</sup>  
LSK

asymmetric  
cell division

symmetric  
cell division

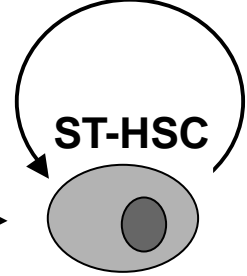

CD150<sup>+</sup>  
CD48<sup>+</sup>  
LSK

asymmetric  
cell division

symmetric  
cell division

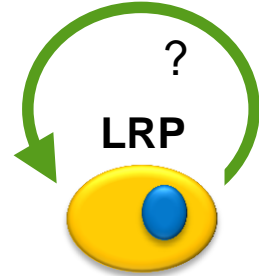

CD150<sup>-</sup>  
CD48<sup>+</sup>  
LSK

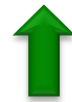

asymmetric  
cell division

partial differentiation  
block?

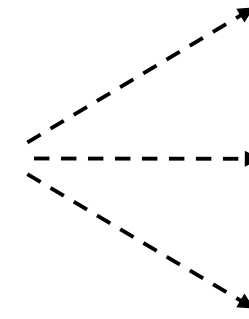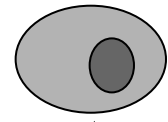

MEP

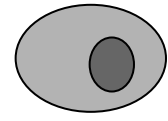

CMP

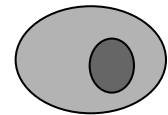

GMP

?

AML

second  
tumorigenic  
hit

|               | genotype          |                   |                   |                   |            |
|---------------|-------------------|-------------------|-------------------|-------------------|------------|
|               | WT-               | WT+               | HET-              | HET+ *            | total      |
| <b>all</b>    | <b>64</b> (23.0%) | <b>77</b> (27.8%) | <b>69</b> (24.8%) | <b>68</b> (24.4%) | <b>278</b> |
| <b>female</b> | 35                | 38                | 31                | 28                | 132        |
| <b>male</b>   | 29                | 39                | 38                | 40                | 146        |

|                                                                                    | Young mice (7-16 weeks) |    |                     |    |         | Older mice (42-46 weeks) |    |                     |    |          |
|------------------------------------------------------------------------------------|-------------------------|----|---------------------|----|---------|--------------------------|----|---------------------|----|----------|
|                                                                                    | WT Mean $\pm$ SEM       | N= | KI Mean $\pm$ SEM   | N= | p-value | WT Mean $\pm$ SEM        | N= | KI Mean $\pm$ SEM   | N= | p-value  |
| Lin <sup>-</sup>                                                                   | 9.85 $\pm$ 0.23         | 14 | 11.26 $\pm$ 0.44    | 14 | 0.0100* | 10.12 $\pm$ 0.437        | 6  | 17.19 $\pm$ 1.612   | 8  | 0.0029** |
| LSK (Lin <sup>-</sup> Sca1 <sup>+</sup> cKit <sup>+</sup> )                        | 0.223 $\pm$ 0.061       | 9  | 0.401 $\pm$ 0.082   | 10 | 0.1003  | 0.360 $\pm$ 0.102        | 6  | 1.946 $\pm$ 0.311   | 8  | 0.0013** |
| LK (Lin <sup>-</sup> Sca1 <sup>-</sup> cKit <sup>+</sup> )                         | 1.987 $\pm$ 0.366       | 9  | 2.167 $\pm$ 0.364   | 10 | 0.7313  | 3.065 $\pm$ 0.3535       | 6  | 4.329 $\pm$ 0.529   | 5  | 0.0724   |
| LT-HSC (CD150 <sup>+</sup> CD48 <sup>-</sup> LSK)                                  | 0.0023 $\pm$ 0.0007     | 3  | 0.0032 $\pm$ 0.0005 | 4  | 0.3694  | 0.0013 $\pm$ 0.0006      | 6  | 0.0133 $\pm$ 0.0061 | 8  | 0.0889   |
| ST-HSC (CD150 <sup>+</sup> CD48 <sup>+</sup> LSK)                                  | 0.0090 $\pm$ 0.0075     | 3  | 0.0117 $\pm$ 0.0052 | 4  | 0.7911  | 0.0024 $\pm$ 0.0009      | 6  | 0.1104 $\pm$ 0.0719 | 8  | 0.1770   |
| LRP (CD150 <sup>-</sup> CD48 <sup>+</sup> LSK)                                     | 0.1840 $\pm$ 0.0594     | 3  | 0.3939 $\pm$ 0.0450 | 4  | 0.0480* | 0.1022 $\pm$ 0.0194      | 6  | 0.9992 $\pm$ 0.2358 | 8  | 0.0068** |
| CMP (CD34 <sup>+</sup> CD16/32 <sup>med</sup> LK)                                  | 0.2640 $\pm$ 0.0480     | 5  | 0.2967 $\pm$ 0.0429 | 6  | 0.6255  | 0.1417 $\pm$ 0.0300      | 6  | 0.1009 $\pm$ 0.0234 | 8  | 0.3090   |
| GMP (CD34 <sup>+</sup> CD16/32 <sup>high</sup> LK)                                 | 0.2220 $\pm$ 0.0381     | 5  | 0.3283 $\pm$ 0.0488 | 6  | 0.1244  | 0.0973 $\pm$ 0.0240      | 6  | 0.0967 $\pm$ 0.0236 | 8  | 0.9864   |
| MEP (CD34 <sup>-</sup> CD16/32 <sup>low</sup> LK)                                  | 0.5200 $\pm$ 0.1820     | 5  | 0.7667 $\pm$ 0.1880 | 6  | 0.3734  | 0.1790 $\pm$ 0.0429      | 6  | 0.2104 $\pm$ 0.0885 | 8  | 0.7566   |
| CLP (Lin <sup>-</sup> Il7Ra <sup>+</sup> Sca1 <sup>med</sup> cKit <sup>med</sup> ) | 0.1283 $\pm$ 0.0308     | 6  | 0.1129 $\pm$ 0.0238 | 7  | 0.7002  | 0.1263 $\pm$ 0.0942      | 4  | 0.1695 $\pm$ 0.0904 | 6  | 0.7504   |

|              | <b>Forward oligonucleotide (5'→3')</b> | <b>Reverse oligonucleotide (5'→3')</b> | <b>Fragment length</b> |
|--------------|----------------------------------------|----------------------------------------|------------------------|
| <b>Glut1</b> | gtcaccatcttgagctgttc                   | cacctgccttctcgaagatg                   | 139bp                  |
| <b>Vegfa</b> | catgcggatcaaacctcacca                  | ctggctttgttctgtctttcttg                | 101bp                  |
| <b>Pgk1</b>  | ccttccttaaggtgctcaaca                  | gtcaacaggcaaggaatcttc                  | 128bp                  |
| <b>Hk1</b>   | ctgtctggacgacatcagaac                  | caggatgttacggacgatctc                  | 127bp                  |
| <b>Bnip3</b> | cacagctactctcagcatgagaa                | cagacgcctccaatgtagatc                  | 145bp                  |
| <b>Pdk1</b>  | ggaagatcgacagactctcaac                 | gaggcgtgatatgggcaatc                   | 136bp                  |
| <b>Hprt</b>  | ggtggagatgatctctcaactt                 | ccagcaagcttgcaaccttaac                 | 142bp                  |
